# Supplementary material
Source: bioRxiv or medRxiv preprint supplement (https://www.biorxiv.org/highwire/filestream/85400/field_highwire_adjunct_files/2/277400-3.pdf)
Supplement: Supplementary file [file 277400-3.pdf]

## Group A formation proteins from randomForest analysis

>epi\_00394

MSFNEIIFKNFKQNVTHYAIYLLSLVISVVLVYFSFVTLKYAHHL  
HGNQSFPAIKEGSQVGSYFLFIIIVVFLLYANFLFLKRRGRELSLLQIIGLTKKDIMK  
MIMLEQLMTFMMTTIVGIIILGIFGSKILLMIVLRLLLGINVSVSIIFNHAILETLLLI  
AVSVYLVIVFQSYVYLLKRSIKELASDVNKKEFSHTRTTLGEVVLGLLGIIMIVSGYIM  
STKLVDNVETIIQPFAILFLTVIGSYFFRSTVSLIFKAIQRLRNGTVSVTDVMFTSP  
IIYRVKKNAFSLTVMTVVSVAITVSVLCAALSRSTLTNEVLLSSPHDVTLKNQKQANE  
LAFKLNRRNIEHYNYKEVVYAKVYKDLHLFSEGVYRPKEITVTSVKYIPNVSTKKGQT  
DIIIPRGLKDVVKTDKKRTAYVGSKKFRLKVSRLRGINKVYFMSDVDRGRPTLILND  
EDYQKIREHIKEKNIVSQYGFDLKNKNDLPELEKLVSSINEDIETRSEAASEISSLTG  
ILLFVTSFLGITFLIAAGCIIYIKQIDETEDELNYTILRKLGFTHQDMSKGLKLVKI  
FNFGLPLIIALLHAYFASLAYMHLNMVNTNQIPIFIVMAVYTATYAVFAIIAYNHSKRT  
IKHSI

>epi\_00430

MKNLFLSSVAVILSICLVLLLFLATNQNALAKVHKTICTFTKVK  
TVSHNDIFPNLNMNHVAEASEKNSDHQKNVKNKTNQSVRTQASYDFNPQECKVIALNY  
AENHLSKKYNIERTFNESLSHSVYVFSSENKLNHQTQVKNKSGTVHASNINNH

>epi\_00538

MKDWTINNHSKRQLIIQSNHDDISIIIEPLRNGSFKILAEFNALN  
TDYIQVYDHTLVVSIHEKEISVFDRSSQSI

>epi\_00542

MKLISKSIYLSFIFFIIFSLMLFTNQSFANDNKRQKLPKPGDIIIVT  
KGPVLNGFFGHCSLAIDHDTVLQIEGPGDKPMTEDFESYRDRYGKGNKNEWIKVYRCSH  
PNAGTKAAQWAKKHYENSSEYLVTFNLKSETFTYCTKIIYQAYKYGVDKNSVSDHGL  
YIISPYALTDNFTDEYKLLKLVKTY

>epi\_01643

MKNQDKIQNVVKKLLSSLGVNIKKTKSRLDIINTLPTSNOVSHLK

>epi\_01831

MQQQKIKRFLAHFVLDHVTIEYLKYGHQLTIEQLKLLIFILHFT  
ENHKEDLSLNMIIFYKNYQKNQLLKSITHLYEFNWISKKRHPYDQRRLVITLTQNQCS  
KITQLIEELEHFLEVKSTLINEINHSTLLSYLKYKCHSQFRVIEQSCTSQHLTLEELYL  
LGLLIIISDNKTTFKSIKVHALKGIAMGPIIKTLQSKGYLIKRSRDERYIVLTLRK  
EKVNVIQSEIEECYNKLEQGIQHV

>epi\_01832

MRENYŠIRVFNNLAINTEKALSVKVFYCLKGKCEVTINVQKHIL  
EKDDIAFVVMNDTYSLLSNTETMCCIIDIPIHRYLSQKDTQFLISGTKIDESSRDRIK  
YWILKILELHCLSYNDVSEIQRLIQFLLELSYLKPKLVDNKFYLSEDIHQYLVDH  
HDSKINKHELAEAVNLSNQALTSMFQKTPFQTFNQYLNQLRLKFCFLIDILTTHKPIEE  
IAIDHGFFHYSRFIQLFKNTYGYTPKLIIRDYIATSIFKNTAAEIDLDRHFLMNIHEL  
QDLDSKIIISKYIKMSDKGKKYRSYDIYIEDNRSTILDQEQIVHIKRNLSLSQKSMRY  
VIELNYTSMIENKELCRYEMLKILRFCSGLNLIPTFKIITDRHDTFTSKEKMAKLT  
QMLFIMLREFNQLEIEFIVEDMMLKQVVQLKKMISSYFEYKLNRYIKNEKIGNVNYQ  
NLEKQVTQIFIPIDQLHLYIKEMSFVKVILETSYLTDLKSEVVEYPWLQHIHTLIKMC  
GLVRGVLIQPSFDYATTYTYHSNLKPHHILSYVIRMFNQLRGTIVYKDDAIIMTKYKY  
EYQAIAIFLNRIKENVNHQQLIFSDIQSLNHAIEYIEEMPLLNMENNELDSHIPYP  
HQYWLAKLKSSESQQAIVDLPKMSIAHLTFLCS

>epi\_01980

MDIKQŠSEKQGRPHHLSDSRTVLKRNFIPIPTYILLQSIPIIIV  
VFGSLGITAMITQQAPPQWLYHCSLSLSFVIAQGLILIIFYKIHQSVINDVMKQQWII  
AKNKIIKIVIVAVVYLLLLLIIRVIGTSLPNHLSYHLTQSEQRTLGLFKSPYVLLVTF  
ISMVFLRPMVEQIIYRYLIIHELKGVWNRQFVIGLSIVIETIVHVYDMASIFEIFPYI  
VIASAATILYIKSRDNLIVAYIFQVILQCILFIEILCKYTNF

>epi\_02055

MSFYEFMQNFLGDDTPLGELVDWINQDINFPKDVTSQKEILTYF  
RNHPCPENIPVTSIKRALAVFNQFTKV

>epi\_02098

MKKISLIATTVLTGLLLFPSVNDTTTHAAEVTSHDAQAVAIQAM  
KNSGGNPDQLQNFKKVKDKGDYFTIDINNKSAGVGTYKVKYKNGVVLYKSGNYGEYSQL  
NTRQCYVAQDIATTSSQVKRHSTQQTQAVDSTRELNSYVGVQVQSSDLPQQSSSDMLP  
NTGMKDKNFNTNGIISLFLLLTAGFITLYHQPLRKMS

>epi\_02108

MSFYHFIQNFVGDDETPLGKLATCINQDEDLPMEEETAHNILNYF  
NQLNYFDDDCIEAVKRSLSLYEQSKVAL

>epi\_02134

MTFKILWKMFKQNFVNQRHIIVPPFISVISILFGIEYILLSLTTN  
IYFNEHHPKELKISAIIGIVFMTMLLFIFLIYANHFVMNHRKKEFALNMALGMEKKHLR  
LIIILIELFIQFIISAILSIVGGYLFGEFFMLFNKIVNTHQPQLSDYFPDVLMSKITL  
TMLLSLMIILFVINNFKISFKNSLQLLIKNKSKEKSRVRLIIFLILGLIFIGIGYY  
LAIKPNTAIGSLGIIFFAILSTLIGTYLLFVSLGSIIVLEMLQKLDHYYYKPNHFFFAIA  
GLKSRVKSSAIGLATISFMCTFLIVTLSMTVSTYRNMDFRFEFAFKNDYAGYYIGDFH  
KDSKIQRKIENLKKDIRQEVPTGQFKIYARGMVGAEIQGGLKHKKLRQTVSSGLFNF  
GNKQKFNSFISYINKSDYNKNNKIKLDDDEIAISTSVSLFKMKTLNIFGKTYRVKY  
IESTNIDNLLYADGITLIVNQQQLMDRIVNEYRNHNENLIITPNQVQTAVEFNVLKE  
KDKLNHRIKKIGVQHDIEFQVKKQNLMLWKQVNSSLIFVGSVSVLVLIGIFLMMYYK  
QVSEGHEDRDAYITMKQLGLDEILIKKTINKQVIWVFLIPVIVAIHTLAAFRIIYSV  
LGIVGQYDLGLYATSYVGVIVVFIIFYSMMYWITSRIYYTMINDKH

>epi\_02135

MLLEVKNVKKVYGRGMNTTMALNQMNLEIDENEFVAIMGESGSG  
KSTLLNLIATFDRTTEGLIKLDGLPLNQLKNKDIARFRREMMGFVFQDFNVLNTMSNK  
DNILMPLVLANERPIMQKRLMEISEQLGIEDLLEKYPSEISGGQKQRIAIARALIA  
PKLLLADEPTGALDSKTSKNLMCLFRKINQKHQITILMVTHSNIDASYANRVIIFIKDGR  
LYHEIYRGEESQTDYQKRIADSLAILNGVGD

>epi\_02136

MKFAYIQSIRNEISIIILIIILLFFALIFVVFSLPFDAYVLAISII  
LLLMCVRWIKYLSFKKNEHLKDKVAYLEHELAHVKNQQIEYRNDVESYFLTWHQIK  
TPITASQLLLERNEENVNRVQRQIVHIDNYTSLALSYLKLLNEESDMITKVTVDLL  
IRPLILKYRIQFIEQKTIHYEKSEDIILTDAQWASIMIEQLLNNALKYAKGKDIWID  
FDVANQTLQIKDNGIGISKADIPKIFDKGYSGFNGRLNEQSTGIGLFIQVHIANHLNI  
QVTVQSELNHGTVFFIHFTEK

>epi\_02137

MKIFIVEDDLVIAESLANELSKWNYEVHVVDNFEKIMEDFRRVE  
PQLVLLDINLPTLNGFHWCEMRKVSHVPIMFISSRDNDMDQILAIQMGDDFIEKPF  
NLSLTVAKIQALLRRTYDLSIARDEIAVKGCKLIVDEAKLSKDNEHVQLSLELQILK  
LLFQONENKYVSRALIEKWESENFIDDNTLAVNMTRLRKLLSIGVDDLIETKKNVG  
YRV

>sap\_00201

MTKLEVINPATNEVLERLDYATHEQINHQIKQAHQAFQNWKKVDAHERSAKLAQWAQLID  
DHQDELARLITLEGKPLAEAKGEVAYANSYVKWYAEAEAKRVYGRTPANSPSKKIVIDK  
FPVGVGAIPTWNFPAAMITRKMAPALAAGCTIICKPAVKTPLTTIKLVLAHQAGFPKD  
AISYIIASGKDAGDIFTNHSLISKVFTFTGSTAVGKSLIESSAQVKNVTMELGGLAPLIV  
HNDADIEAAVDGTIASKFRNAGQTCICANRIYVHEDIAEAYNEKLEKVVHALSVGDGLKE  
EVKIGPLIDNQAVEKVLTHIKDAQEKGGQLSRSIEDIQALGGNFKLPVITNANLDMKAM  
HEETFGPVAPVMTYSDLDEVINIANDTEFGLASYFFTNDYRTGLKLFNELEYGVIGWNDG  
GPSAAHAPFGGLKESGYGREGGVEGIEPYLETKYLSIQE

>sap\_00203

MKNHLHRWVIEALSFMALGLFGSLIIGLILETIGNQTLIPQIDLSFLSEIGKVAMSVTGA  
AIGVAIAYGLGAKPLVIFSCVIVGTLYTTFGGGAVGAYIATLIVVELSRFYASKTKIDI  
IVTPLLTIIVIGGAIKLFGPALNEFMGTGLGKVIIVATEQQPLIMGILVSVLFLGLALTAPI  
SSAALALMLDLSGLAAGAATIGCAAQMVGFVNGYKDNWGSIGLSIGIGTSMQVQVNIK  
HPMILVPTIASAVVAPVMTTLFPMTNNAAGAGMGTSGLIGQIMTINTMGGSLQTWLLII  
IFHIIIPAVISFALYKYFFKKQWIMPGDQLIHVAN

>sap\_00398

MKVFLKLGWFFKQKTSYLIGLGTLLLIALIEIVPPQIIGRTIDEMTSNRLTPRLLAIYL

FILVITAILTYVLRVWRLSIFGTSQKLGKILRTYLYKKYTEMSAIFQNRRTGDLMAHA  
TNDIRAVQNAAGAGILMIADSLITGGTVIITMATTVSWKLTLIAMIPLPFMVLLTSIYGS  
LLSKGFKKAQAAFSKLNDKTQESVAGIKVTKTFGYEPSDQADFKHLSDDVVAKNLKVKSI  
DALFDPTITLVIIGMSYFLSIAFGAQMVFHNDISLGQLITFNTYLGMLVWPLLALGLFFNI  
VQRAKASYERIEEIGELPNDIDTSYVIDERPOGDIRFNINQFYFPGNEDQGIYDIHFTIK  
EGSTVGIVGRTGSGKSALIRLLREFDTQHAQDIEFGGHPIRDYNVESLRAQFGYVPOEH  
FLFSTTIRNNIAFSNETIDDEKIFEASKLSHIHDDIMQFSKDYQTVVGERGVSLSGGQKQ  
RVSIARALLVNPEILILDDSLSAVDAQTEEAILENLERLRSGKTNIITAHRMSAVKHADL  
IIVMNEGRIIERGNHATLMSKKGWYYDYQAAQALQEQLSRNLDLSLTCKGDGEND

>sap\_00399

MTENANLTAKDQGSALIRLFKYTLPYKWIIVLAFITLILSTIASMMTPYMKIFIDDYLT  
PRHFPKETMVWLIVIFISIQLIGAITLYFSQYLFQYLAFKVIQQLRIDAFNKLKGLGMRY  
FDKVPGGSIVSRLTNDTETIVDMIVGVFSTFIMAFFMMISSYIMMFVLDVKKLALIALIFL  
PIIMIILASYRKYSAFLFSKSRQRLSDLNKLAESIEGMKIIQAFNQERRLNKEFNKIND  
EHYQYMLKTVKLDLSLLLRPAISSISIFAVVMILGYFGVISFTTGITAGVVFVAFVQYMERF  
FEPINQVSNLNLILQQALVSASRVFALINDDTYEPQQEANNNDNAIETGEIEFDNVFSYD  
GETDVLKNIISLTAKPGEMIALVGHGTGSGKSSIINLFMRFYEFNRGDIKIDGNSIKKIPKT  
ELKEKIGLVLQDAFMFYGTIASNIKLYHPSMTFFEQVKAAAEFVHANHFIEKLPNQYQHKV  
IEKGSASFSSGERQLIAFARTIATNPKILILDEATANIDSETEEQIQQSLNKMRKGRITLA  
IAHRLSTIQDADQIFVLNKGEIVERGTHAQLIAQKGIYHNMYLLQNG

>sap\_00643

MSVLVLGGAGYIGSHAVDQLISRGYDVVVVDNLGTGHRAAVNKDARFYEGRDIRDKPFLDQ  
VFTTETIEGVFHFCAYSLVGESVEKPLAYFNNNVNGLQVLLVEMYDHQVKHIFSSAAV  
YGEPTVPITEADSKTPTSPYGESKLMMEKMMHWSHNAYGVNYAALRYFNVAGAKEEGTI  
GEDHRPETHLVPIVLQVALGQREALTIFGDDYDTEGSCIRDYLHVVDLIDAHILAYQHL  
QNGGESGAFNLGSSQGYSVFEILEAARKVTNKP IEAKVGPRRAGDPSKLVASSDKAQSIL  
GWKPKHDNIHDIIDSAWRWHNQHPNGYQEDTEV

>sap\_00760

MNISNPKIYEQVADIILENIKSEDYQVGDKLPISIQKLSKQFGVSTASVREALNALRTIGV  
IEMKQGYGTFIKQIEPTFFFEFGDKFNLSLVQIKELLELREIVESATVANAAARYRNKADLEK  
LATALSVMGEAVIDGTSGEKADLEFHLAIAHAAQNSLLVLELLNNISELMQNSMEETRKIF  
IYDKQKTMTKLLEEHEMIYHAILEQDDKTAVKAMQSHLLEVKQTIILANFKET

>sap\_01003

MKTKHLSLKIIVIALVLGIAIGSIFNVFSNTAFVENVDKYLEFNVIGQIFLNLI FMLVVPV  
FVSIVLVGVVGVGDPKLLGGIGIKTITFFLTTTATAIAIIIGITLALVLQPGAGKSELLNSDD  
VSSYQQTLEKEDSSQDSAAKQTFDQTLINLFPKNPLQAMTDENMLQIISFAIFIGVGIIM  
VGSKAQMVHKFLEQTNDVLMYIVTMMMSVFAPIGTFGLVAHAFTGAGFGAIQQLGMYFFI  
VLLGLGIHFFVYGAAVKFMKSSPLKFFKDFIPAITLGFSSASSSTATLPVSLECTKKMG  
VRREIASFVQPLGATINMDGTAIMQGVATIFIAQISGVTLVSQIITVVVIAVVASIGTA  
GVPGVGLIMLAMVLNAVGLDPAAGIILGIDRLLDMTRTSGNITGDAACALVISNAEERK  
LAKERTLNE

>sap\_01607

MKYKTVFDIIGPTMVGPPSSHTAGAVRIGLVARDLNFQPKQADIYLYGSFMETYKGHGT  
DVALVGGLLYDTHDDRIQTSLETAEEAGMKVNFIEMAEERSHPNTAIINMRDGDKEISV  
EGVSIIGGGKIEVVAINGFNIAISGNYPALLVFKHDTFGTIGRVANILGDSSINVGSMQVS  
RKEKGDQALMTCELDDAVNDETIIEKIKNVDGVVTVSLMGDA

>sap\_02162

MKYKTVFDIIGPTMVGPPSSHTAGAVRIGLVARDLNFQPKQADIYLYGSFMETYKGHGT  
DVALVGGLLYDTHDDRIQTSLETAEEAGMKVNFIEMAEERSHPNTAIINMRDGDKEISV  
EGVSIIGGGKIEVVAINGFNIAISGNYPALLVFKHDTFGTIGRVANILGDSSINVGSMQVS  
RKEKGDQALMTCELDDAVNDETIIEKIKNVDGVVTVSLMGDA
